# Supplementary material for: No Evidence Of Sensory Neuropathy In A Traditional Mouse Model Of Idiopathic Parkinson’s Disease
Source: Preprints.org preprint supplement (doi:10.20944/preprints202403.0625.v1), 2024-03-11
Supplement: Supplementary file 1 [file S1 file.docx]

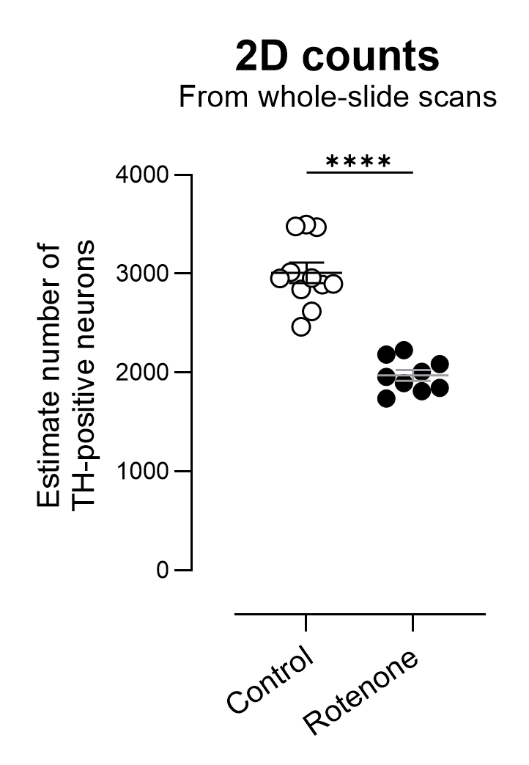


Supplementary Figure 01. Counts of TH-positive neurons in SNpc from whole-slide scans of a stereological series (1:6) through the entire SNpc. ****p<0.0001 (Mann Whitney test). Symbols are of individual mice, and horizontal bars show mean ± SEM.
