# Supplementary material for: No Evidence Of Sensory Neuropathy In A Traditional Mouse Model Of Idiopathic Parkinson’s Disease
Source: Preprints.org preprint supplement (doi:10.20944/preprints202403.0625.v1), 2024-03-11
Supplement: Supplementary file 2 [file S2 data file.xlsx]

## Sheet: Fig1 A
	Control	Rotenone
	32275554	24425069
	34932482	16398073
	49654571	12013674
	32749487	20225955
	31610247	14977823
	26065545	6856181
	28391990	19162312
	36262991	16406922
	29254756	12790036
	25585739	12667743
	21752988
	32829953

## Sheet: Fig1 B
	Control	Rotenone
	8252.51	4145.97
	7741.11	4451.19
	8188.12	3805.5
	7355.64	3993.79
	8592.66	3921.74
	8881.15	4463.34
	8387.3	4467.13
	7521	4653.75
	7748.75	4723.35
	7411.23
	8152.75

## Sheet: Fig 2
	Region of interest	Control											Rotenone
	SNpc + SNpr	4.9515	17.823	13.149	10.0525	10.4525	17.124	9.9935	24.6135	13.405	18.088	27.667	10.136	27.1645	25.6455	28.1765	16.9255	13.426	47.3235	47.849	42.198	38.1875
	pons	14.76	7.1305	25.555	3.403	5.01	2.348	9.9405	8.405	44.756			11.5845	11.446	34.1065	21.4145	8.815	34.4925	21.439	37.3055	19.984

## Sheet: Fig 3 A
	Age (d)	Control												Rotenone
	84	100	100	100	100	100	100	100	100	100	100	100	100	100	100	100	100	100	100	100	100	100	100
	88	100	100	104.545	95.6522	92	96	100	96.2963	104.545	100	96	100	96.2963	96	95.4545	100	100	96.2963	96.5517	96	100	100
	91	100	100	104.545	100	96	104	104.762	103.704	104.545	100	100	100	100	100	100	108.333	103.846	100	103.448	100	103.846	100
	92	96.5517	95.8333	100	97.8261	88	95.2	104.286	96.6667	100.455	101.364	95.2	95.2	96.2963	94.4	95	101.25	96.1538	95.5556	97.931	95.6	98.4615	95.8333
	94	103.448	100	104.545	100	92	100	102.381	98.1481	100	100	102	100	103.704	94	100	100	103.846	101.852	103.448	100	103.846	100
	98	95.5172	96.125	101.045	94.6957	87.2	95.2	98.5714	102.593	100.455	101.818	99.72	98.96	98.8889	94	98.1818	101.667	102.308	99.6296	101.172	98	101.654	102.625
	102	104.483	103.333	104.955	102.913	92.16	102.4	105.238	102.963	102.091	104.455	100.44	104.4	106.296	99.44	103.636	101.417	106.192	105.037	103.586	104.04	102.423	105.333
	104	100.172	101.167	103.091	98.913	92.6	103.04	106.952	103.074	104.909	106.818	99.16	100.8	98.2222	104.36	99.3636	101.833	92.7692	89.8889	98	90.76	91.6923	91.0417
	105	102.759	104.583	105	102.174	92.4	103.6	108.095	102.963	106.364	106.364	98.4	102.4	99.6296	88.4	89.5455	95.8333	100.769	90.7407	98.6207	82.8	82.3077	80.8333
	106	103.103	104.583	106.364	102.609	92	101.2	106.19	100	104.545	105.909	96.4	102.8	100.37	91.2	79.0909	89.1667	100	92.5926	100.345	84.8	88.0769	89.1667
	107	105.862	104.792	106.818	103.478	94.8	104.8	105.714	101.852	102.045	105.455	100.4	106.4	103.778	96.4	79.8636	97.0833	103.846	100.37	102.069	92	95.3846	93.75
	108	102.414	103.333	106.818	101.304	94.8	105.2	108.095	101.852	105.455	107.727	101.6	105.6	101.481	98.4	89.5455	99.1667	101.538	98.5185	101.724	94.4	98.0769	95.8333
	109	104.828	105.417	109.545	103.478	95.6	104	107.619	102.963	104.545	107.273	100.8	106.8	103.704	100.8	94.5455	101.25	104.231	100	103.793	96	98.8462	96.25
	110	102.069	103.458	110	102.174	92.8	103.6	108.571	101.111	104.545	108.636	99.6	106.8	102.963	98.4	94.5455	100	103.077	98.8889	102.759	95.6	98.4615	94.5833
	111	104.138	105.417	109.545	103.478	94.8	106	109.524	102.963	106.818	109.091	104.8	110.8	104.444	99.6	101.818	104.583	108.077	104.815	104.483	99.2	102.692	100
	112	105.172	105.417	109.091	104.783	92.4	106.8	110	102.222	105.909	108.636	104.8	109.2	104.074	100.8	102.273	104.583	108.462	100.741	102.759	100.4	103.462	99.1667
	113	104.828	105.417	108.182	103.913	94	104.8	111.905	103.704	106.364	108.182	103.6	107.2	103.704	100.2	100.545	103.333	104.615	98.8889	101.034	97.2	98.8462	97.5
	114	104.828	106.667	110.455	103.913	92.8	103.2	109.524	102.593	107.273	107.273	101.6	108.8	102.963	99.6	100	102.917	103.846	99.6296	103.448	96.8	99.6154	97.9167
	117	105.172	107.208	110.455	106.696	94	104.8	110.476	103.704	108.636	107.727	103.2	109.6	103.333	99.6	96.8182	100.833	102.308	98.8889	103.69	97.2	99.2308	101.333
	121	104.483	109.167	112.273	105.217	95.2	106	110.952	104.074	108.182	108.182	104	106.8	104.815	102.4	96.3636	100.417	101.154	100.37	103.793	96.8	99.2308	98.75
	124	104.828	112.5	116.818	107.826	96.4	105.6	111.238	102.222	108.636	110	106.24	107.2	102.963	102	95	100	100	99.4444	103.517	107.44	93.8462	98.3333
	127	107.241	113.75	114.545	109.13	102	109.6	113.81	107.778	110.455	110.455	108.4	112.8	104.815	111.2	99.5455	105.833	105	106.296	106.897	100.4	105.769	103.333
	132	106.931	113.75	113.182	107.826	102.68	108.8	111.429	106.667	110	109.773	110.4	112.56	106.481	106.4	100	106.667	105.923	102.963	105.862	104.4	107.269	105.833
	136	106.552	111.25	113.636	108.696	100	108.4	112.381	106.296	110.455	105.455	108.8	111.2	106.296	106.4	101.818	102.917	107.308	103.333	104.828	102	105	106.25
	139	104.138	110.083	111.818	107.087	100	106	112.381	105.556	108.182	106.364	110.12	113	102.963	106.16	99.2727	100.833	106.923	99.8889	104.621	100.08	102.423	104.667
	142	108.172	108.583	109.364	104.696	100.8	112	110.476	110.37	111.364	108.182	112.24	114	104.556	106.56	100	102.5	106.923	104.222	106.552	102.24	104.346	105.583
	145	107.138	108.833	113	110	98.4	107.6	111.905	106.148	109.909	107.409	109.2	116.64	107.148	103.6	96.3636	102.708	105.308	103.556	106.414	102.68	102.769	104.042
	148	108.621	112.708	114.5	110.87	100.96	111.2	114.857	111.741	113.955	114.182	113.8	121.04	109.259	105.8	99.0909	107.292	105.923	105.296	105.103	100.84	103.154	104.417
	150	106.793	111.292	112.864	108.261	98	110	110.476	107.037	108.818	110	108.24	113.6	105.704	103.08	95.2273	100.833	103.846	102.222	104.828	100.04	103	101.667
	152	108.621	112.708	114.5	110.87	100.96	111.2	114.857	111.741	113.955	114.182	113.8	121.04	108.889	105.8	99.0909	107.292	105.923	105.296	105.103	100.84	103.154	104.417
	155	110.276	112.917	118.545	110.913	99.2	110	114.333	107.556	111.091	108.727	110.24	115.16	108.556	107.24	96.1818	102.708	105.038	104.593	103.69	100.92	100.962	98.5833
	159	111.724	112.5	116.818	112.609	103.6	114.8	119.048	110.37	113.182	113.182	116.72	118.28	110.37	108.8	97.7273	103.75	108.346	107.037	107.483	103.52	105.038	105.125
	161	114.138	115.417	117.727	113.478	101.6	116	113.333	112.963	115.455	113.182	116	116.8	112.222	109.2	97.7273	104.167	110.385	105.926	109.31	103.6	104.231	105
	164	112.759	114.583	117.727	110.87	101.2	114.4	116.19	112.963	115	111.818	114	115.2	108.519	110.8	96.3636	105.833	110	107.037	107.931	102.4	104.615	103.333
	168	113.103	116.667	117.273	110.87	103.2	116	117.619	112.222	114.545	113.182	115.2	118.8	111.111	111.6	99.0909	105.417	111.923	110.37	108.966	105.2	108.846	105.833
	171	108.966	114.167	116.818	110.87	98.8	112.8	116.19	108.519	113.182	110.455	111.6	111.6	104.815	106.8	94.0909	102.917	106.538	107.037	105.517	102	103.846	102.5
	175	110.69	115	114.091	110	100.4	111.2	111.905	113.704	112.273	111.364	112.84	116.2	109.259	106.8	96.3636	103.333	109.308	106.667	106.276	102.6	105.385	106.208
	178	112.069	114.833	120.636	112	101.28	114.4	119.429	113.259	114	112.636	114.12	119.4	107.704	110.12	98.0909	103.792	110.692	105.741	110.828	104.32	106.423	106.917
	182	110	116.667	116.364	110	104	115.2	120.476	111.852	113.182	113.182	116	118.4	107.778	107.08	98.6364	105.417	110.385	107.037	106.552	103.2	107.308	106.667
	185	111.034	117.5	122.727	112.609	103.2	115.6	120	111.852	114.091	113.182	116	116.4	107.778	107.8	98.1818	105	110	107.037	108.276	103.6	108.462	107.5
	189	112.069	118.333	121.818	113.043	106.4	115.6	123.81	111.852	119.091	117.727	117.2	118.8	111.111	109.6	99.8636	106.667	111.538	107.037	110.345	103.2	109.615	106.667
	192	113.448	118.75	122.273	113.913	105.6	115.2	123.667	110.37	116.818	116.818	116.8	119.2	110	110	99.5455	107.5	111.154	106.667	108.966	102	106.923	106.667
	196	112.759	119.167	124.091	112.609	107.6	116.4	124.762	113.333	120.455	119.091	121.2	121.2	113.704	109.2	98.6364	108.333	110.769	107.778	110.69	102	110	109.583
	199	113.793	119.167	121.364	113.478	107.6	118	126.19	114.074	118.636	120.909	115.2	119.6	112.222	112.4	102.727	108.75	110.385	107.037	109.655	103.6	108.846	108.75
	203	115.862	125	127.727	118.261	110.4	118.4	130	118.889	124.091	124.091	121.6	122	115.926	114.4	104.545	110	114.231	108.519	113.448	107.2	113.077	113.75
	206	114.483	121.25	130	116.957	108.8	117.2	130.952	116.296	121.818	121.364	119.92	121.2	112.963	112.8	98.6364	110.833	111.538	107.407	113.448	106.8	111.538	112.917
	210	110.345	123.75	126.364	116.522	110.4	117.2	129.524	121.481	123.636	123.182	118.8	122.4	110	113.6	99.5455	110.833	111.538	108.519	112.759	106.8	111.538	111.042
	213	114.828	122.917	127.727	117.826	112.4	122	129.048	119.63	124.091	121.364	119.6	123.2	112.222	115.2	101.818	115	112.692	110.37	111.724	106.8	112.308	112.5
	217	114.483	122.5	126.364	117.391	112	120	129.524	118.519	121.364	118.727	118.4	120.8	117.037	116.8	98.6364	113.75	111.538	110.37	110.345	107.6	110	112.5
	220	117.241	120.833	122.727	116.087	108	118.8	127.619	117.778	118.182	118.182	118.8	121.2	111.111	114.8	97.2727	110.417	111.923	110.37	110.345	108.4	108.077	112.917
	224	119.655	121.25	128.182	119.13	108.8	122	126.667	116.667	120.909	118.182	119.6	124.4	116.296	117.6	98.6364	111.667	115	113.333	113.793	109.6	111.923	112.083

## Sheet: Fig 3 B
	Timepoint	Control												Rotenone
	Baseline	13544.6	6747.01	6822.57	17808	14657.2	16603.9	9393.12	11889.4	12621.1	7016.55	20217.5	21784.4	6802.45	6961.73	13174.9	15114.3	5931.17	4227.89	14558.6	8460.07	20969.5	23224.2
	5wks	28562.9	12669.4	12045.1	9637.87	19771.1	11860.5	24915.6	19027.4	11234	11065	7755.86	6329.61	7232.68	21976.7	24468.3	14041	19735	5959.2	8361.15	8330.16	28651.5	11772.3
	10wks	17855.5	6746.62	8366.29	6712.91	10843.7	9039.73	9713.8	9394.64	8998.69	7290.42	7662.82	6035.44	7125.89	13093.8	19907.5	10074.3	21393.1	6329.43	9643.91	8824.08	17808.5	14183.8
	15wks	13919.1	6468.98	10169.6	8350.53	9924.32	9150.15	12245.8	9989.13	9102.89	9850.15	10379.9	6959.3	6636.04	11097.9	26390.5	9198.22	19694.7	5501.4	12648.4	8432.66	15138.9	11256.1

## Sheet: Fig 4 A
	Timepoint	Control												Rotenone
	Baseline	56.3333	45.6667	48.6667	51.6667	51.3333	46.3333	45	45.6667	41.6667	48.3333	53.3333	52	39	53.3333	48.3333	36.6667	47	49.3333	52.3333	50	52.6667	49.3333
	5 weeks	64.6667	54	56	47.3333	49.3333	51.3333	39.3333	43.6667	36	45.3333	58.3333	63.6667	46.6667	47.3333	41.6667	41	51.6667	47.6667	62.6667	46	46.3333	43.3333
	10 weeks	51	61	51	53.6667	42.3333	51	49.6667	47.3333	37	53	51.6667	42.6667	33	37.3333	41	48	44	49.3333	58	49.6667	37.3333	45
	15 weeks	48.6667	47	48.6667	44.3333	47.3333	46.6667	43	48.6667	34.3333	44.3333	52	52.6667	36.6667	42.3333	31	42.3333	37	47	50.6667	48.3333	41.6667	43

## Sheet: Fig 4 B
	Timepoint	Control												Rotenone
	Baseline	197	223.667	233.333	209.333	135.333	224.667	193.333	189.667	181.333	149.333	135.667	146	204.667	165.333	155.333	146.667	164	148.667	268.333	177	180.667	217.333
	5 weeks	243	233	226	208	212	216.333	220.667	221.333	189	166	280.333	329.333	238.667	157	149.667	208.333	275.667	249.333	270	183.333	275	198.333
	10 weeks	213.667	233.667	241.333	233.667	283.333	261	174.667	230.667	222.333	218.333	281.667	251	172	169.667	173	207.333	175	178.667	287	168.667	215	185.333
	15 weeks	257	314.333	244.667	194.667	213	224	189.667	209.333	218.667	195	287.333	194.333	228.333	186	133.333	237.667	151.667	250	188	151.333	199.667	155.667

## Sheet: Fig 4 C
	Limb	Control												Rotenone
	Forelimb	9.35	10.1667	10.22	9.26	10.1333	10	8.625	9.14	8	8.45	8.175	7.8	9.86667	7.88	4.975	9.08	7.8	6.76	8.725	8.375	7.7	7.8
	Hindlimb	9.325	9.96667	10.082	9.24	9.8	9.7	8.625	8.92	8.075	8.225	8.1	7.65	10.1667	7.58	4.7	9.06	7.93333	6.78	8.725	8.4	7.43333	7.675

## Sheet: Fig 4 D
	Limb	Control												Rotenone
	Forelimb	1.075	1.6	1.7	1.32	1.33333	1.5	1.25	1.5	1.375	1.55	1.65	1.6	1.4	1.14	1.875	1.1	1.43333	1.46	1.425	1.325	1.8	1.825
	Hindlimb	3.05	3.16667	2.7	2.82	3.33333	3.53333	3.1	2.96	3.125	3.25	2.8	3.25	3.3	3.08	2.65	3.06	2.96667	2.94	3.175	3	3	3.4

## Sheet: Fig  5 A
	Timepoint	Control												Rotenone
	Baseline	160.333	76.6667	141.333	78.6667	64	36	167.333	70	89.6667	81.3333	41.3333	58.6667	45.6667	131.667	59	71	146.333	109.667	97.6667	126.667	104	115.333
	Week 2	54.75	60.5	86	129	20.5	34.5	181.5	125.25	87.5	29	20.5	62	23.5	35.5	56.75	30.5	19.5	56.5	105.75	25.5	98.5	72.5
	Week 4	109	93.75	95.5	123.75	26.5	37	163	89.75	85	58.25	27.5	49.5	45.75	47.75	26.75	24	28.5	26.75	133.25	24.75	71.25	57.5
	Week 6	37.25	82.25	96	129.75	39.75	27.25	175.5	106.5	95	66	24.75	57.25	26.25	39.5	26	32.5	47.75	54.25	111.5	25	82.25	51
	Week 8	86.75	57.25	58.25	107.75	24.25	27.25	124.75	89.75	94	49.5	26.5	48.75	21.75	29	16	33	29.5	53.75	85.25	20.5	35.5	39.25
	Week 10	105.25	44.75	58.25	95	23.75	32.75	126	72.25	101.5	56	42.5	33.25	24	30	27	29	38	34	103	28.5	31.75	27.75
	Week 12	88.25	44	74.25	110.75	18.75	28	91.075	50.25	100.5	46.5	31.25	28.25	26	26.5	17.5	30.5	28.5	33.5	107.5	19.5	21.5	35.5
	Week 14	110	64	21.75	115.5	30	30.75	133.75	54	83.5	22.5	30.25	19	18.5	30.5	16.25	32.5	21.75	31.75	94	24.25	27	77.5
	Week 16	125.5	61.5	17	89.75	27.5	32.5	93.25	53	121	26.75	41.25	19.25	41.5	30.75	34.75	51.75	32.5	22.75	98	26	26.25	82.25

[truncated: 11 more sheets: Fig 5 B, Fig 6 A,  Fig 6 B, Fig 6 C, Fig 6 D, Fig 7 A, Fig 7 B, Fig 7 C, Fig 8, Fig 9, 2D S1 data]
